# Supplementary material for: Kaempferol Promotes Apoptosis While Inhibiting Cell Proliferation via Androgen-Dependent Pathway and Suppressing Vasculogenic Mimicry and Invasion in Prostate Cancer
Source: Hindawi journal article supplement (doi:10.1155/2019/1907698), 2019-12-01
Supplement: f1 [file 1907698.f1.pdf]

Supplementary figure

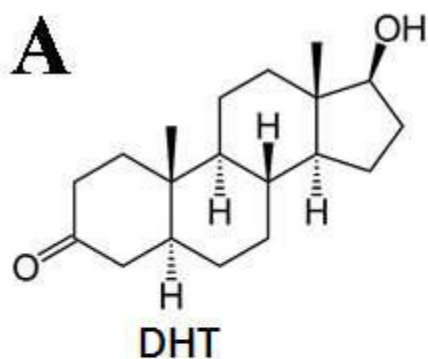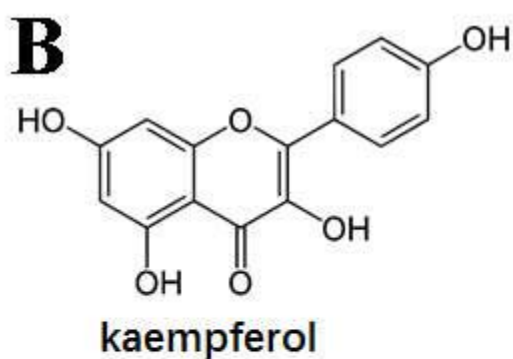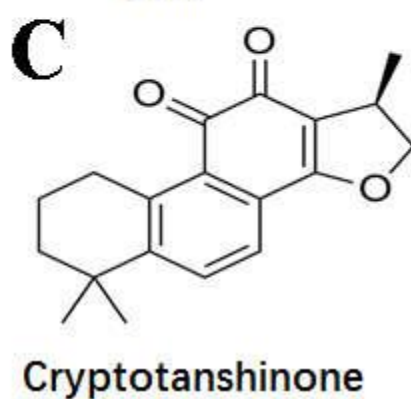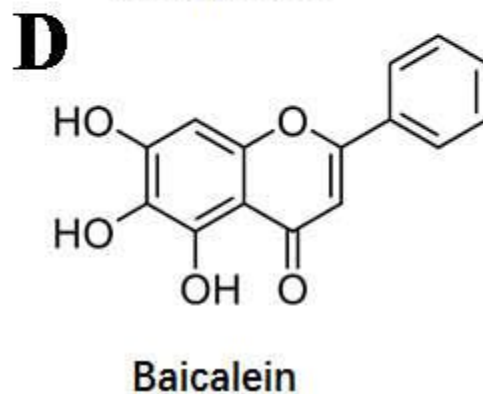

(A) Dihydrotestosterone (DHT) which is an androgen. (B) kaempferol, a natural flavonol widely found from fruits and vegetables.(C) Cryptotanshinone, a major tanshinone isolated from *Salvia miltiorrhiza* and exhibits multiple activities.(D) Baicalein, a flavonoid originally isolated from the roots of *Scutellaria baicalensis* Georgi. The structure of kaempferol, Cryptotanshinone or Baicalein is similar to DHT.
